# Supplementary material for: Widespread Reassortment Contributes to Antigenic Shift in Bluetongue Viruses from South Africa
Source: MDPI journal article supplement (doi:10.3390/v15071611), 2023-07-23
Supplement: s1 [file s1]

**Supplementary Table S1. BTV isolates used in this study as well metadata concerning the country of origin, year of submission and GenBank accession numbers.**

| <b>Virus serotype</b> | <b>Isolate name</b>        | <b>Country of origin</b> | <b>Year of isolation</b> | <b>Accession number</b> |
|-----------------------|----------------------------|--------------------------|--------------------------|-------------------------|
| BTV-1                 | BTV-1_VR27_RSA_2017        | Ermelo, MP, RSA          | 2017                     | MG255599 - MG255608     |
| BTV-1                 | BTV-1_VR49_RSA_2017        | Edenburg, FS, RSA        | 2017                     | MG255659 - MG255668     |
| BTV-1                 | BTV-1_VR13_RSA_2017        | Elliot, EC, RSA          | 2017                     | MG255549 - MG255558     |
| BTV-1                 | BTV-1_VR06_RSA_2017        | Queenstown, EC, RSA      | 2017                     | MG255519 - MG255528     |
| BTV-2                 | BTV-2_VR18_RSA_2017        | Queenstown, EC, RSA      | 2017                     | MG255569 - MG255578     |
| BTV-2                 | BTV-2_VR62_RSA_2017        | Beaufort West, WC, RSA   | 2017                     | MG255689 - MG255698     |
| BTV-2                 | BTV-2_VR04_RSA_2017        | Bethal, MP, RSA          | 2017                     | MT028379 - MT028388     |
| BTV-3                 | BTV-3_VR05_RSA_2017        | Queenstown, EC, RSA      | 2017                     | MG255509 - MG255518     |
| BTV-3                 | BTV-3_VR22_RSA_2016        | Bethal, MP, RSA          | 2016                     | MT028399 - MT028408     |
| BTV-3                 | BTV-3_VR11_RSA_2017        | Wesselsbron, FS, RSA     | 2017                     | MG255539 - MG255548     |
| BTV-3                 | BTV-3_VR33_RSA_2017        | Smithfield, FS, RSA      | 2017                     | MG255619 - MG255628     |
| BTV-4                 | BTV-4_VR01_RSA_2017        | Rosendal, FS, RSA        | 2017                     | MG255489 - MG255498     |
| BTV-4                 | BTV-4_S74_RSA_2016         | Ceres, WC, RSA           | 2016                     | MG255459 - MG255468     |
| BTV-4                 | BTV-4_VR24_RSA_2017        | Wesselsbron, FS, RSA     | 2017                     | MG255579 - MG255588     |
| BTV-4                 | BTV-4_VR39_RSA_2017        | Smithfield, FS, RSA      | 2017                     | MG255639 - MG255648     |
| BTV-4                 | BTV-4_4wtrus_RSA_2011      | Rustenburg, NW, RSA      | 2011                     | KT317665 - KT317674     |
| BTV-4                 | BTV-4_VR30_RSA_2017        | Smithfield, FS, RSA      | 2017                     | MG255609 - MG255618     |
| BTV-4                 | BTV-4_VR31_RSA_2017        | Bloemfontein, FS, RSA    | 2017                     | MT043208 - MT043217     |
| BTV-4                 | BTV-4_VR03_RSA_2017        | Bethal, MP, RSA          | 2017                     | MG255499 - MG255508     |
| BTV-4                 | BTV-4_VR42_RSA_2017        | Smithfield, FS, RSA      | 2017                     | MG255649 - MG255658     |
| BTV-4                 | BTV-4_VR34_RSA_2017        | Smithfield, FS, RSA      | 2017                     | MG255629 - MG255638     |
| BTV-4                 | BTV-4_VR48_RSA_2017        | Vryheid, KZN, RSA        | 2017                     | MT043258 - MT043267     |
| BTV-5                 | BTV-5_Benoni_RSA_2015      | Benoni, GP, RSA          | 2015                     | MG255449 - MG255458     |
| BTV-5                 | BTV-5_VR45_RSA_2017        | Queenstown, EC, RSA      | 2017                     | MT043248 - MT043257     |
| BTV-7                 | BTV-7_VR43_RSA_2017        | Beaufort West, WC, RSA   | 2017                     | MT043228 - MT043237     |
| BTV-12                | BTV-12_VR44_RSA_2017       | Queenstown, EC, RSA      | 2017                     | MT043238 - MT043247     |
| BTV-12                | BTV-12_VR16_RSA_2017       | Elliot, EC, RSA          | 2017                     | MT028389 - MT028398     |
| BTV-12                | BTV-12_VR54_RSA_2017       | Queenstown, EC, RSA      | 2017                     | MG255669 - MG255678     |
| BTV-12                | BTV-12_VR55_RSA_2017       | Queenstown, EC, RSA      | 2017                     | MG255679 - MG255688     |
| BTV-13                | BTV-13_Prieksa_03_RSA_2014 | Prieksa, NC, RSA         | 2014                     | MG255469 - MG255478     |
| BTV-13                | BTV-13_VR38_RSA_2017       | Smithfield, FS, RSA      | 2017                     | MT043218 - MT043227     |
| BTV-16                | BTV-16_VR08_RSA_2017       | Bethal, MP, RSA          | 2017                     | MG255529 - MG255538     |
| BTV-17                | BTV-17_Prieksa_07_RSA_2014 | Prieksa, NC, RSA         | 2014                     | MG255479 - MG255488     |
| BTV-17                | BTV-17_VR17_RSA_2017       | Queenstown, EC, RSA      | 2017                     | MG255559 - MG255568     |
| BTV-24                | BTV-24_VR25_RSA_2017       | Beaufort West, WC, RSA   | 2017                     | MG255589 - MG255598     |
